# Supplementary material for: Multiplexed immunohistochemical analysis of the immune microenvironment of biliary tract cancers pre- & post-neoadjuvant chemotherapy: case series
Source: PubMed Central journal article supplement — Ann Transl Med. 2024 Jun 5;12(4):78. doi: 10.21037/atm-23-1928 (PMC11304425; doi:10.21037/atm-23-1928), 2024-06-05
Supplement: atm-12-04-78-supplementary.pdf [file atm-12-04-78-supplementary.pdf]

## Supplementary

**Table S1** MICSSS marker vendor and clones used

| Marker  | Species | Company                   | Clone      | Catalog #   |
|---------|---------|---------------------------|------------|-------------|
| CD3     | Rabbit  | Ventana                   | 2GV6       | 790-4341    |
| FOXP3   | Mouse   | Abcam                     | 236A/E7    | ab20034     |
| CD20    | Mouse   | Dako                      | L26        | M0755       |
| CD68    | Mouse   | Dako                      | KP1        | M0814       |
| CD163   | Mouse   | Novus Biologicals         | 10D6       | NB110-59935 |
| DC LAMP | Rat     | Novus Biologicals         | 1010E1.01  | DDX0191P    |
| PD-1    | Rabbit  | Abcam                     | EPR4877(2) | ab137132    |
| PD-L1   | Rabbit  | Cell Signaling Technology | E1L3N      | 13684S      |

MICSSS, multiplexed immunohistochemical consecutive staining on single slide.
